# Supplementary material
Source: MDPI journal article supplement (https://www.mdpi.com/2079-9284/9/6/120)
Supplement: s1 [file s1 › cosmetics-2023289-supplementary.pdf]

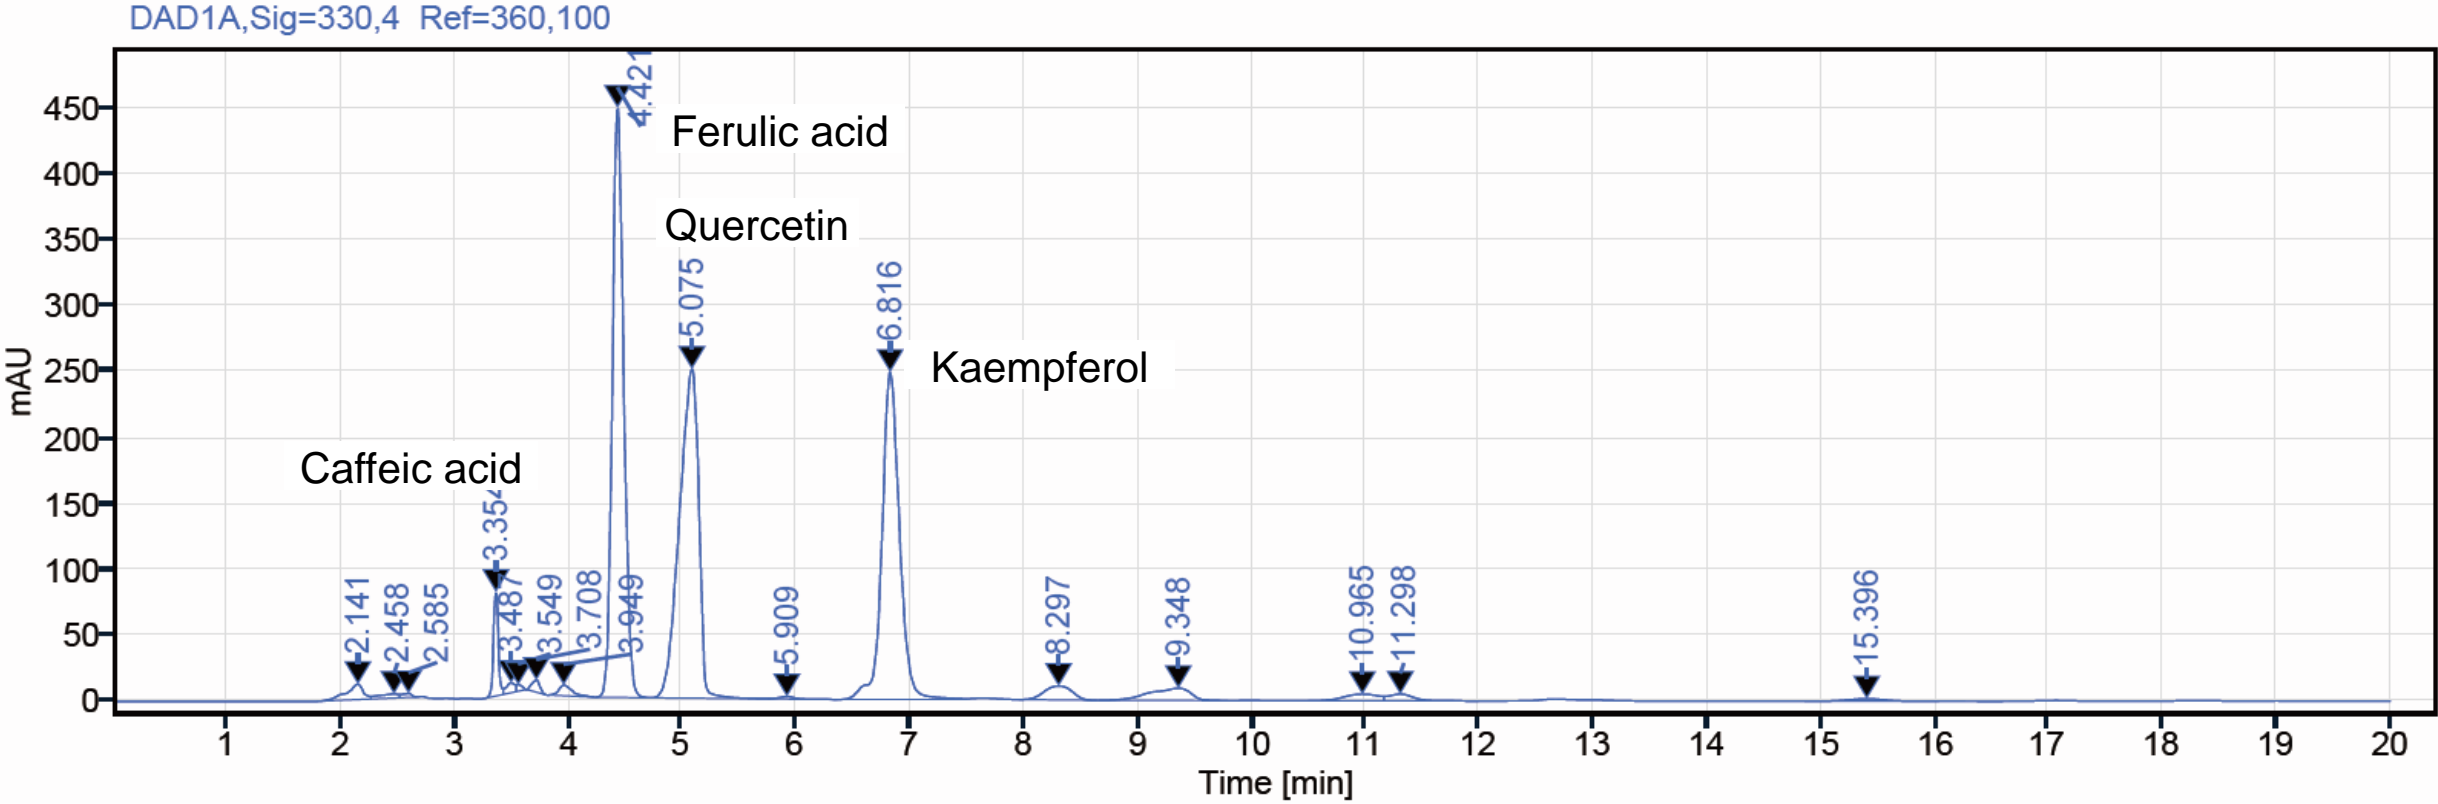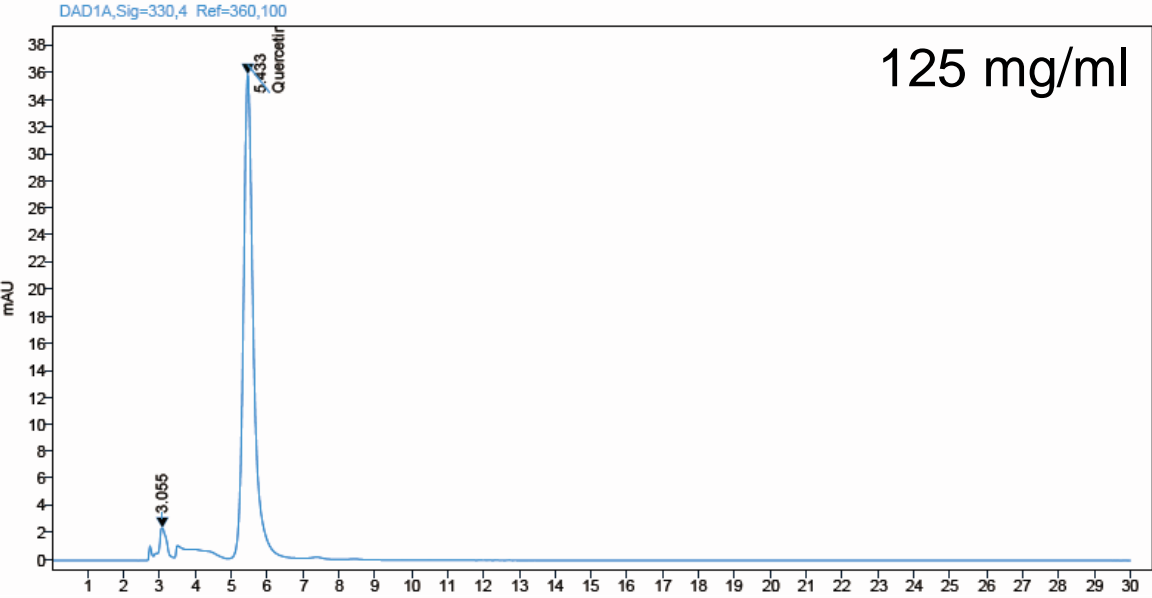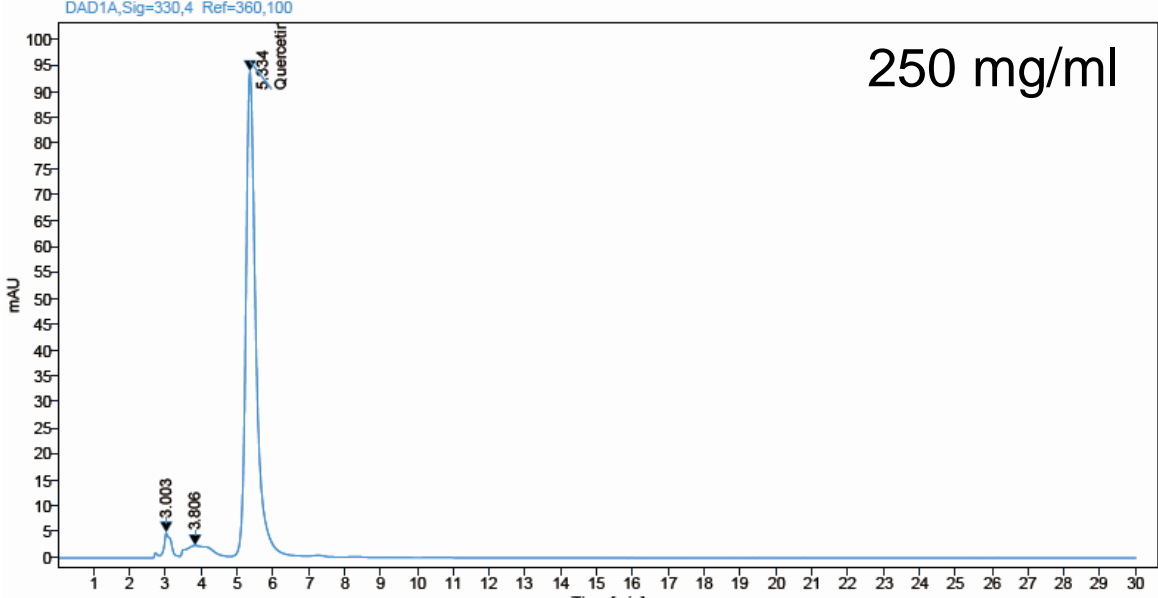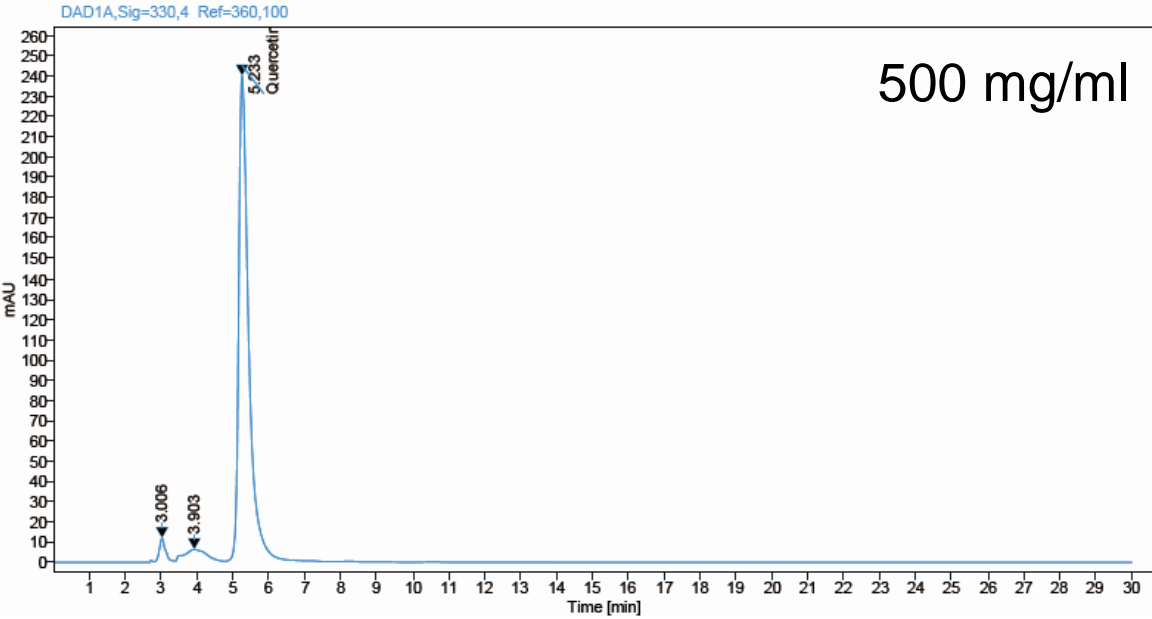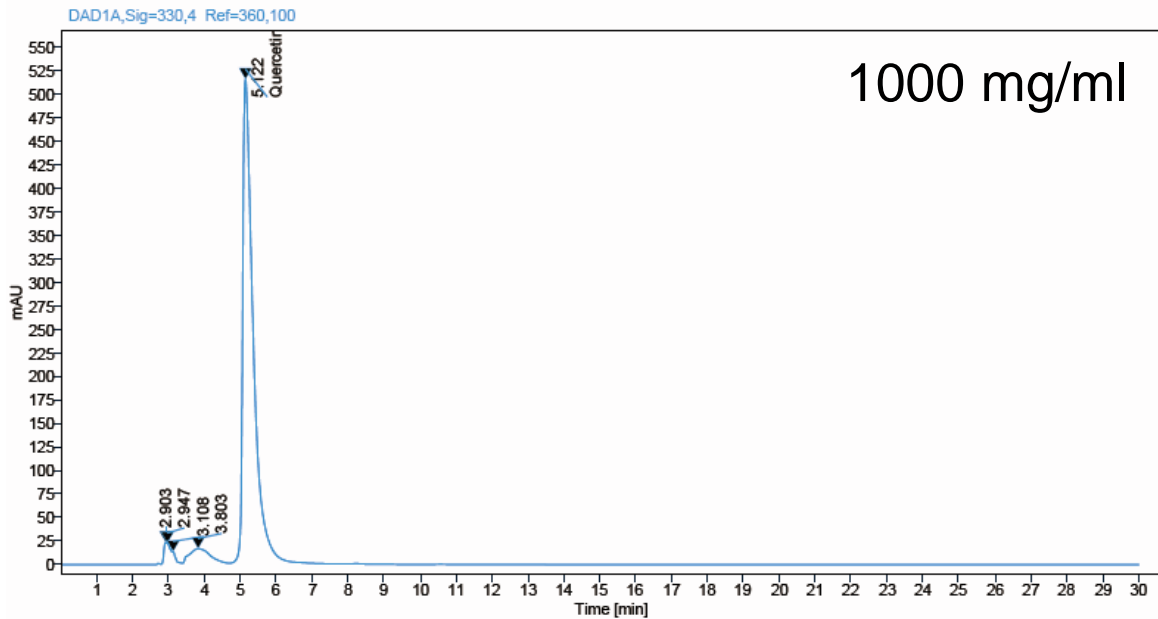

**Compound:** Quercetin

**Signal:** DAD1A

**Exp. RT:** 5.200

**Residual:** 369.95481

**R:** 0.99987

**R^2:** 0.99974

**Formula:**  $y = ax + b$

**a:** 10.6360

**b:** -476.6967

**c:** 0.0000

**d:**

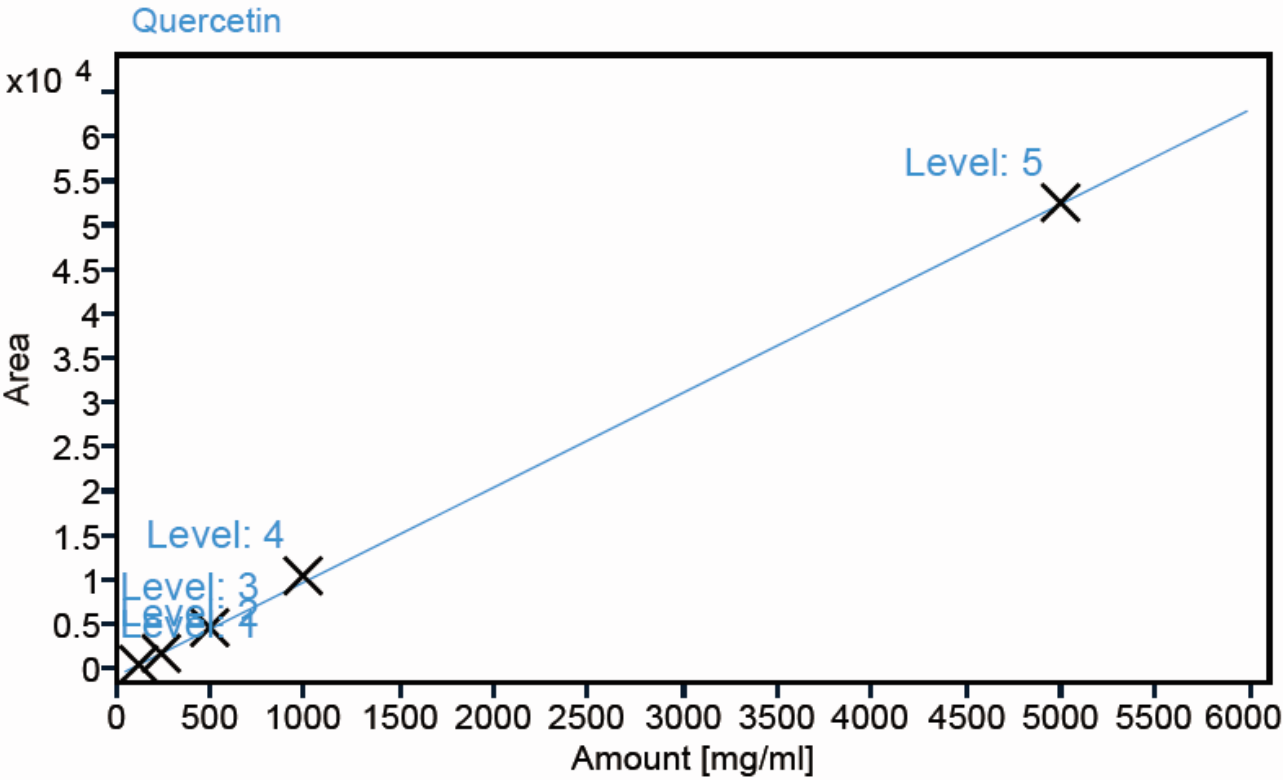

**Supplementary Figure S1.** HPLC chromatogram of FESCL and calibration chromatogram of Quercetin as flavonoid marker.
